# Supplementary material for: Comparative Transcriptome Analysis Reveals Related Regulatory Mechanisms of Androgenic Gland inEriocheir sinensis
Source: Hindawi journal article supplement (doi:10.1155/2017/4956216), 2017-01-01

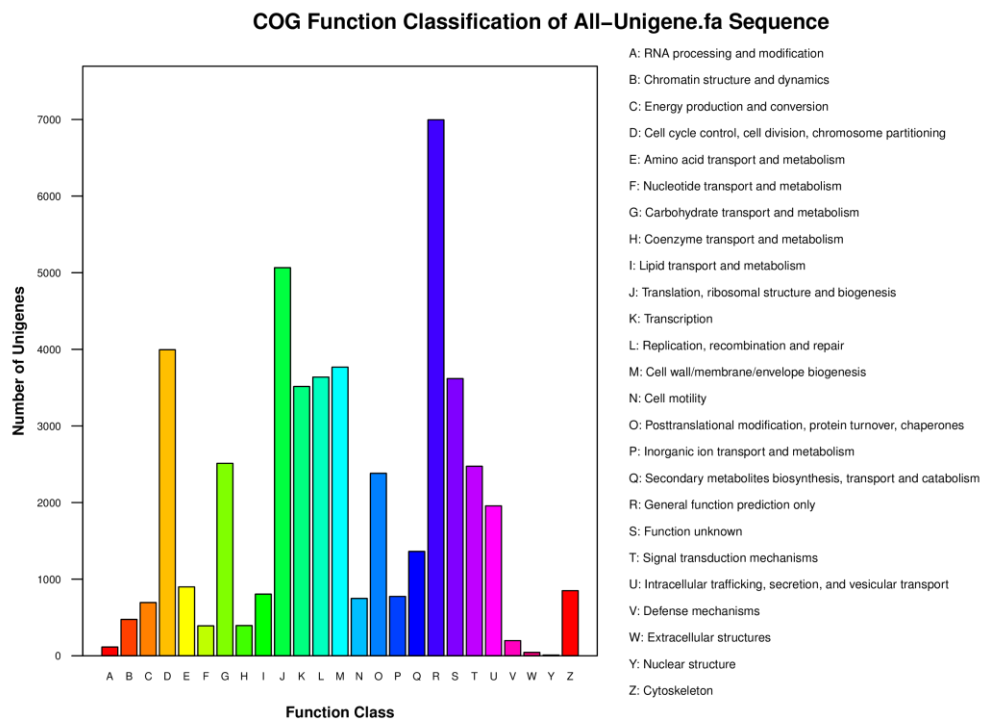

883  
884  
885  
886  
887  
888  
889  
890  
891  
892  
893  
894  
895  
896  
897  
898  
899  
900  
901  
902  
903  
904  
905  
906  
907

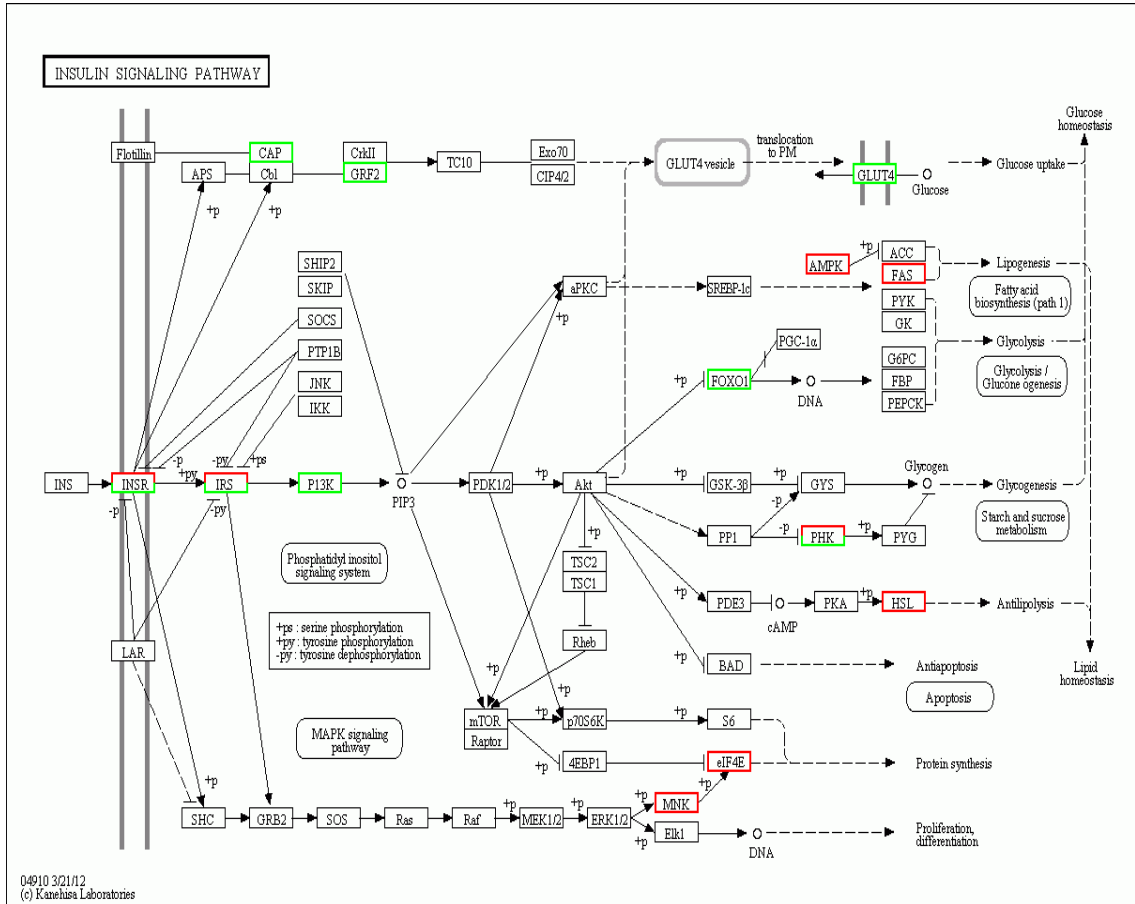

S3 Fig.

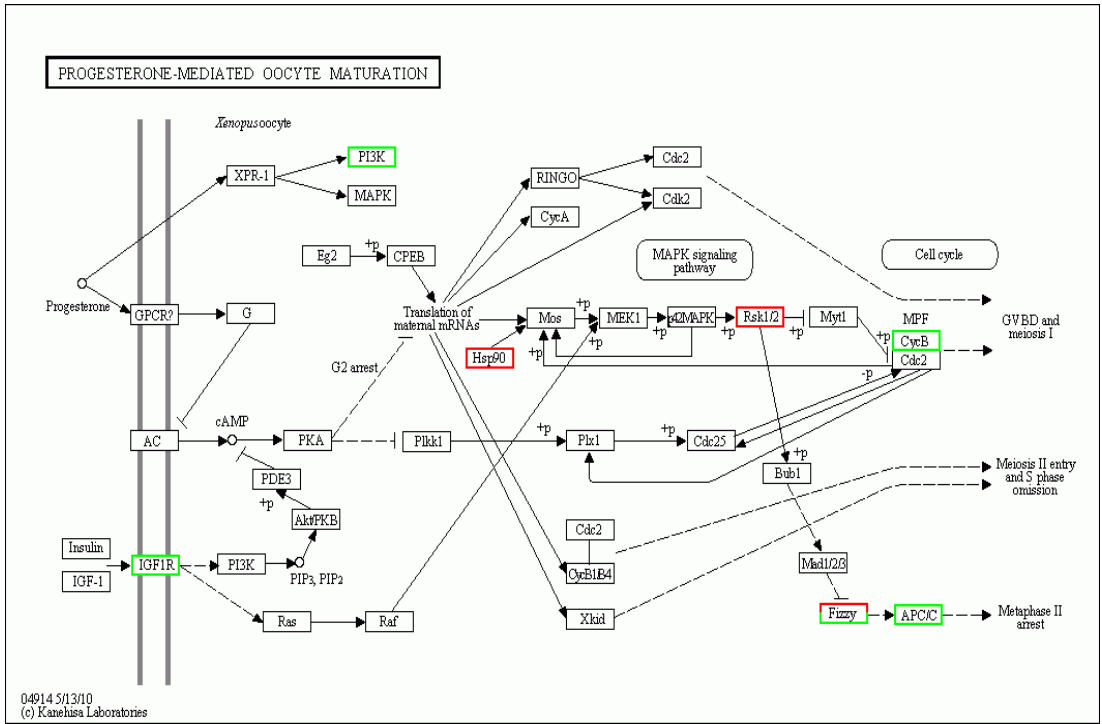

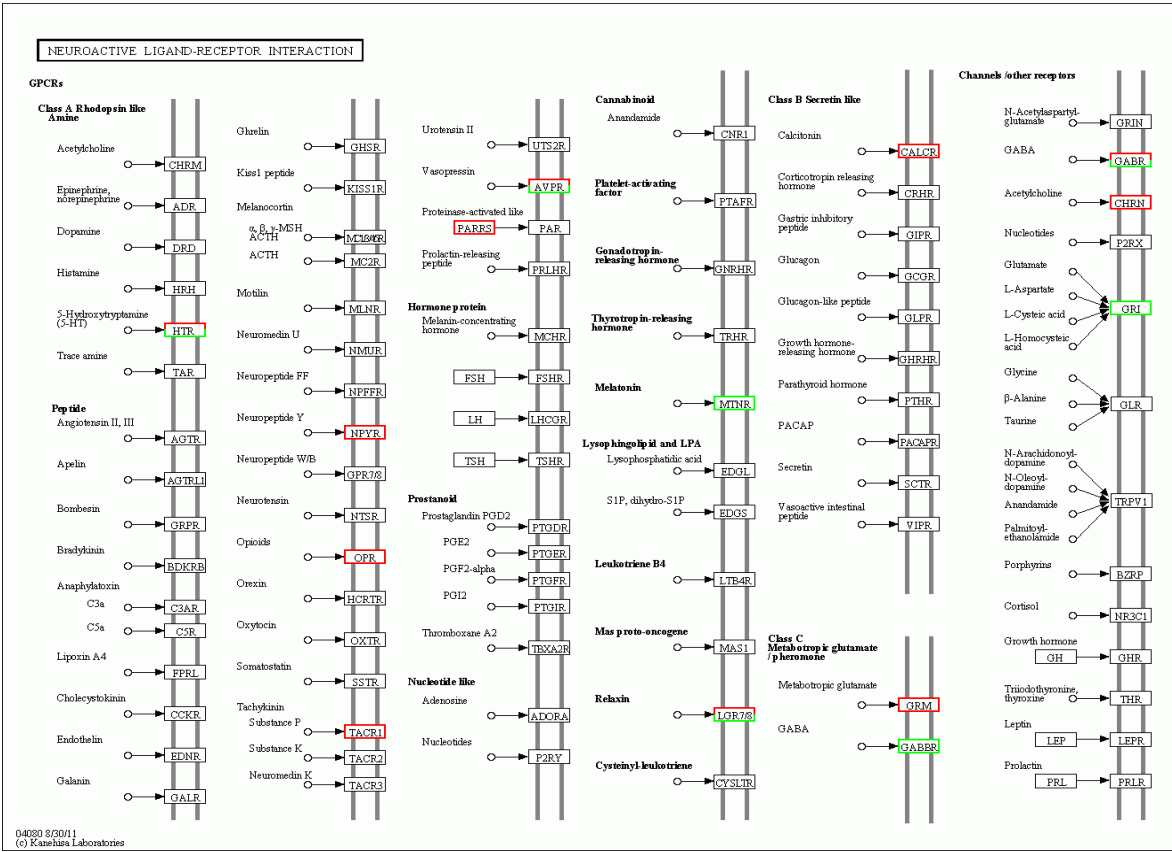

Supplement: f1 [file 4956216.f1.pdf]
